# Supplementary material for: Evaluating Hepatobiliary Transport with18F-Labeled Bile Acids: The Effect of Radiolabel Position and Bile Acid Structure on Radiosynthesis andIn VitroandIn VivoPerformance
Source: Hindawi journal article supplement (doi:10.1155/2018/6345412), 2018-01-01
Supplement: f1 [file 6345412.f1.zip]

Archive with 2 entries (2 files):
- 6345412_SupplDesc.docx
- mat.6345412.v2.docx
