# Supplementary material for: Evaluating Hepatobiliary Transport with18F-Labeled Bile Acids: The Effect of Radiolabel Position and Bile Acid Structure on Radiosynthesis andIn VitroandIn VivoPerformance
Source: Hindawi journal article supplement (doi:10.1155/2018/6345412), 2018-01-01
Supplement: f1 [file 6345412.f1.zip › 6345412_SupplDesc.docx]

# Supplementary Material

The file “supplementary data” contains the organic synthesis pathways to obtain the precursors for radiosynthesis of 3α-[18F]FCA, 7β-[18F]FCA; 12β-[18F]FCA, 3β-[18F]FGCA and 3β-[18F]FCDCA.
